# Supplementary material for: Structural Brain Correlates of Loneliness among Older Adults
Source: PubMed Central journal article supplement (PMC6753249; doi:10.1038/s41598-019-49888-2), 2019-09-19
Supplement: 41598_2019_49888_MOESM1_ESM.pdf [file 41598_2019_49888_MOESM1_ESM.pdf]

## **Structural Brain Correlates of Loneliness among Older Adults**

Sandra Düzel<sup>1\*</sup>, Johanna Drewelies<sup>2</sup>, Denis Gerstorff<sup>2</sup>, Ilja Demuth<sup>3</sup>, Elisabeth Steinhagen-Thiessen<sup>3</sup>, Ulman Lindenberger<sup>1, 5</sup> & Simone Kühn<sup>1, 6</sup>

<sup>1</sup>Max Planck Institute for Human Development, Berlin, Germany

<sup>2</sup>Humboldt University Berlin, Germany

<sup>3</sup>Charité – Universitätsmedizin Berlin, corporate member of Freie Universität Berlin, Humboldt-Universität zu Berlin, and Berlin Institute of Health, Lipid Clinic at the Interdisciplinary Metabolism Center, Germany

<sup>4</sup>Charité - Universitätsmedizin Berlin, BCRT - Berlin Institute of Health Center for Regenerative Therapies, Berlin, Germany

<sup>5</sup>Max Planck UCL Centre for Computational Psychiatry and Ageing Research, Berlin, Germany, and London, UK

<sup>6</sup>University Clinic Hamburg-Eppendorf, Hamburg, Germany

## Supplementary Information

### A.1 Review of Studies investigating Associations between Loneliness and Size and Activation of Different Brain Regions

| author, year of publication    | journal                                            | waves | n   | age-range    | measure of loneliness                         | covariates                                                                                    |
|--------------------------------|----------------------------------------------------|-------|-----|--------------|-----------------------------------------------|-----------------------------------------------------------------------------------------------|
| <i>Cross-sectional Studies</i> |                                                    |       |     |              |                                               |                                                                                               |
| Layden et al., 2016            | <i>NeuroImage</i>                                  | 1     | 55  | 20-29        | Revised UCLA Loneliness Scale (Russell, 1996) | age; gender; depressive symptomatology; objective isolation                                   |
| Inagaki et al., 2017           | <i>Social Cognitive and Affective Neuroscience</i> | 1     | 31  | 24.26 ± 7.57 | Revised UCLA Loneliness Scale (Russell, 1996) | age; gender; ethnicity; feelings of social connection                                         |
| Kanai et al., 2012             | <i>Current Biology</i>                             | 1     | 108 | 18-39        | UCLA Loneliness Scale (Russell et al., 1980)  | age; gender; social network size; anxiety; empathy; social perception skills; autistic traits |
| Kong et al., 2014              | <i>Experimental Brain Research</i>                 | 1     | 308 | 18-27        | Revised UCLA Loneliness Scale (Russell, 1996) | age; gender; total GMV; neuroticism; extraversion; psychoticism                               |

|                                 |                                                      |   |     |               |                                              |                                                                                                                                                             |
|---------------------------------|------------------------------------------------------|---|-----|---------------|----------------------------------------------|-------------------------------------------------------------------------------------------------------------------------------------------------------------|
| Tian et al., 2017               | <i>PLoS ONE</i>                                      | 1 | 30  | 21.3 ± 2.4    | UCLA Loneliness Scale (Russell et al., 1978) | anxiety; depression; interpersonal reactivity; trust; social support                                                                                        |
| Ti et al., 2018                 | <i>Social Cognitive and Affective Neuroscience</i>   | 1 | 100 | 22-35         | NIH Toolbox (Salsmann et al., 2013)          | perceived emotional support; perceived instrumental support                                                                                                 |
| Wong et al., 2016               | <i>Psychological Medicine</i>                        | 1 | 54  | 67.45 ± 5.427 | 20-item UCLA-Loneliness Scale (Russell 1996) | age; gender; MMSE; Depressive symptoms; Severity of depression, onset age (years); number of episodes; actual depressed (months); use of hypnotics (months) |
| D'Agostino, Kattan, Canli, 2018 | <i>Social Neuroscience</i>                           | 1 | 99  | 18-22; 57-69: | UCLA Loneliness Scale (Russell et al., 1978) | age; social network (The Social Network Index (SNI))                                                                                                        |
| Sin et al., 2017                | <i>International Journal of Geriatric Psychiatry</i> | 1 | 52  | 67.92 ± 5.0   | 20-item UCLA-Loneliness Scale (Russell 1996) | age; gender; Hamilton Rating Scale for Depression (HAM-D); Short-Form Health Survey (SF-36)                                                                 |

***Longitudinal Studies***

---

|                     |                                        |   |     |       |                                              |                                                                                             |
|---------------------|----------------------------------------|---|-----|-------|----------------------------------------------|---------------------------------------------------------------------------------------------|
| Ehlers et al., 2017 | <i>Frontiers in Aging Neuroscience</i> | 2 | 247 | 60-79 | UCLA Loneliness Scale (Russell et al., 1980) | perceived social support; perceived stress; gender; race; education; marital status; weight |
|---------------------|----------------------------------------|---|-----|-------|----------------------------------------------|---------------------------------------------------------------------------------------------|

| Study                          | Findings – greater self-reported loneliness/ perceived social isolation was associated with...                                                                                                                                                                                                                                                                                                                                                                                                                                                                                           |
|--------------------------------|------------------------------------------------------------------------------------------------------------------------------------------------------------------------------------------------------------------------------------------------------------------------------------------------------------------------------------------------------------------------------------------------------------------------------------------------------------------------------------------------------------------------------------------------------------------------------------------|
| <i>Cross-sectional Studies</i> |                                                                                                                                                                                                                                                                                                                                                                                                                                                                                                                                                                                          |
| Layden et al., 2016            | <ul style="list-style-type: none"> <li>- increased brain-wide functional connectivity (FC) in right central operculum and right supramarginal gyrus</li> <li>- increased FC in cingulo-opercular network (e.g. in bilateral insula/ frontoparietal opercula)</li> <li>- reduced FC between cingulo-opercular network and right middle/ superior frontal gyrus</li> </ul>                                                                                                                                                                                                                 |
| Inagaki et al., 2017           | <ul style="list-style-type: none"> <li>- increased ventral striatum activity when viewing a close other (vs. a stranger)</li> </ul>                                                                                                                                                                                                                                                                                                                                                                                                                                                      |
| Kanai et al., 2012             | <ul style="list-style-type: none"> <li>- less gray matter volume (GMV) in left posterior superior temporal sulcus (pSTS)</li> <li>- weaker activation in ventral striatum when viewing pictures of pleasant social events (vs. pictures of pleasing nonsocial events)</li> <li>- weaker activation in bilateral temporoparietal junction (TPJ) to unpleasant social pictures of people (vs. unpleasant pictures of objects)</li> </ul>                                                                                                                                                   |
| Kong et al., 2014              | <ul style="list-style-type: none"> <li>- greater regional gray matter volume (rGRV) in left dorsolateral prefrontal cortex (DLPFC)</li> </ul>                                                                                                                                                                                                                                                                                                                                                                                                                                            |
| Tian et al., 2017              | <ul style="list-style-type: none"> <li>- altered interactions between resting-state networks</li> <li>- weaker causal flow from dorsal attentional network (DAN) to ventral attentional network (VAN)</li> <li>- decreased causal flow from affective network (AfN) to VN (visual network) inducing stronger VN activity</li> <li>➔ decreased top-down control from higher networks leads to stronger activation in lower sensory networks</li> </ul>                                                                                                                                    |
| Ti et al., 2018                | <ul style="list-style-type: none"> <li>- greater spontaneous neural activity in right inferior temporal gyrus (ITG)</li> </ul>                                                                                                                                                                                                                                                                                                                                                                                                                                                           |
| Wong et al., 2016              | <ul style="list-style-type: none"> <li>- loneliness-related sub-network identified: structural brain networking in regions within the salience network (i.e. amygdala) + additional component that connects left globus pallidus with temporal and occipital regions</li> <li>- increased connectivity within default mode network and cortico-striatal network</li> <li>➔ aberrant networking in subcortical area while processing negative stimuli</li> <li>➔ perceived loneliness plays unique role in relation to negative affective processing (in late-life depression)</li> </ul> |

D'Agostino, Kattan,  
Canli, 2018

- older adults were less lonely compared to younger and dwelled longer on faces, regardless of valence
- no association between loneliness and VS activation to social pictures of strangers in either age group
- no association between social network size and amygdala activation to social stimuli

### *Longitudinal Studies*

---

Ehlers et al., 2017

- change in regional brain volume mediates effects of changes in social support and stress on change in perceived loneliness
- larger baseline amygdalae associated with greater decreases in loneliness (mediated by reductions in stress)
- larger baseline PFC volume was associated with greater reductions in stress (mediated by greater increase in social support)
